# Supplementary material
Source: publisher figshare collection journal article supplement (https://acs.figshare.com/ndownloader/files/4760416)
Supplement: Supplementary file 1 [file 4760416]

  
data_c18h25bf3mon9o5s 
  
_audit_creation_method            SHELXL-97 
_chemical_name_systematic 
; 
 ? 
; 
_chemical_name_common             ? 
_chemical_melting_point           ? 
_chemical_formula_moiety          ? 
_chemical_formula_sum 
 'C18 H25 B F3 Mo N9 O5 S' 
_chemical_formula_weight          643.28 
  
loop_ 
 _atom_type_symbol 
 _atom_type_description 
 _atom_type_scat_dispersion_real 
 _atom_type_scat_dispersion_imag 
 _atom_type_scat_source 
 'C'  'C'   0.0033   0.0016 
 'International Tables Vol C Tables 4.2.6.8 and 6.1.1.4' 
 'H'  'H'   0.0000   0.0000 
 'International Tables Vol C Tables 4.2.6.8 and 6.1.1.4' 
 'B'  'B'   0.0013   0.0007 
 'International Tables Vol C Tables 4.2.6.8 and 6.1.1.4' 
 'N'  'N'   0.0061   0.0033 
 'International Tables Vol C Tables 4.2.6.8 and 6.1.1.4' 
 'O'  'O'   0.0106   0.0060 
 'International Tables Vol C Tables 4.2.6.8 and 6.1.1.4' 
 'F'  'F'   0.0171   0.0103 
 'International Tables Vol C Tables 4.2.6.8 and 6.1.1.4' 
 'S'  'S'   0.1246   0.1234 
 'International Tables Vol C Tables 4.2.6.8 and 6.1.1.4' 
 'Mo'  'Mo'  -1.6832   0.6857 
 'International Tables Vol C Tables 4.2.6.8 and 6.1.1.4' 
  
_symmetry_cell_setting            Monoclinic 
_symmetry_space_group_name_H-M    P2(1)/n 
  
loop_ 
 _symmetry_equiv_pos_as_xyz 
 'x, y, z' 
 '-x+1/2, y+1/2, -z+1/2' 
 '-x, -y, -z' 
 'x-1/2, -y-1/2, z-1/2' 
  
_cell_length_a                    7.9609(4) 
_cell_length_b                    13.6846(7) 
_cell_length_c                    24.5781(13) 
_cell_angle_alpha                 90.00 
_cell_angle_beta                  93.8310(10) 
_cell_angle_gamma                 90.00 
_cell_volume                      2671.6(2) 
_cell_formula_units_Z             4 
_cell_measurement_temperature     153(2) 
_cell_measurement_reflns_used     9454 
_cell_measurement_theta_min       3.033 
_cell_measurement_theta_max       32.381 
  
_exptl_crystal_description        needle 
_exptl_crystal_colour             olive-green 
_exptl_crystal_size_max           0.32 
_exptl_crystal_size_mid           0.12 
_exptl_crystal_size_min           0.14 
_exptl_crystal_density_meas       'not measured' 
_exptl_crystal_density_diffrn     1.599 
_exptl_crystal_density_method     'not measured' 
_exptl_crystal_F_000              1304 
_exptl_absorpt_coefficient_mu     0.637 
_exptl_absorpt_correction_type    empirical 
_exptl_absorpt_correction_T_min   0.672148
_exptl_absorpt_correction_T_max   0.801926  
_exptl_absorpt_process_details    Bruker SADABS 
  
_exptl_special_details 
; 
 ? 
; 
  
_diffrn_ambient_temperature       153(2) 
_diffrn_radiation_wavelength      0.71073 
_diffrn_radiation_type            MoK\a 
_diffrn_radiation_source          'fine-focus sealed tube' 
_diffrn_radiation_monochromator   graphite 
_diffrn_measurement_device_type   'Bruker SMART APEX CCD area detector' 
_diffrn_measurement_method        'phi and omega scans' 
_diffrn_detector_area_resol_mean  ? 
_diffrn_standards_number          ? 
_diffrn_standards_interval_count  ? 
_diffrn_standards_interval_time   ? 
_diffrn_standards_decay_%         ? 
_diffrn_reflns_number             31696 
_diffrn_reflns_av_R_equivalents   0.0429 
_diffrn_reflns_av_sigmaI/netI     0.0362 
_diffrn_reflns_limit_h_min        -11 
_diffrn_reflns_limit_h_max        11 
_diffrn_reflns_limit_k_min        -20 
_diffrn_reflns_limit_k_max        20 
_diffrn_reflns_limit_l_min        -36 
_diffrn_reflns_limit_l_max        36 
_diffrn_reflns_theta_min          3.03 
_diffrn_reflns_theta_max          32.50 
_reflns_number_total              9139 
_reflns_number_gt                 7208 
_reflns_threshold_expression      >2sigma(I) 
  
_computing_data_collection        'Bruker SMART' 
_computing_cell_refinement        'Bruker SMART' 
_computing_data_reduction         'Bruker SAINT' 
_computing_structure_solution     'SHELXS-97 (Sheldrick, 1990)' 
_computing_structure_refinement   'SHELXL-97 (Sheldrick, 1997)' 
_computing_molecular_graphics     'Bruker SHELXTL' 
_computing_publication_material   'Bruker SHELXTL' 
  
_refine_special_details 
; 
 Refinement of F^2^ against ALL reflections.  The weighted R-factor wR and 
 goodness of fit S are based on F^2^, conventional R-factors R are based 
 on F, with F set to zero for negative F^2^. The threshold expression of 
 F^2^ > 2sigma(F^2^) is used only for calculating R-factors(gt) etc. and is 
 not relevant to the choice of reflections for refinement.  R-factors based 
 on F^2^ are statistically about twice as large as those based on F, and R- 
 factors based on ALL data will be even larger. 
; 
  
_refine_ls_structure_factor_coef  Fsqd 
_refine_ls_matrix_type            full 
_refine_ls_weighting_scheme       calc 
_refine_ls_weighting_details 
 'calc w=1/[\s^2^(Fo^2^)+(0.0541P)^2^+1.4124P] where P=(Fo^2^+2Fc^2^)/3' 
_atom_sites_solution_primary      direct 
_atom_sites_solution_secondary    difmap 
_atom_sites_solution_hydrogens    difmap 
_refine_ls_hydrogen_treatment     refined 
_refine_ls_extinction_method      SHELXL 
_refine_ls_extinction_coef        0.0000(3) 
_refine_ls_extinction_expression 
 'Fc^*^=kFc[1+0.001xFc^2^\l^3^/sin(2\q)]^-1/4^' 
_refine_ls_number_reflns          9139 
_refine_ls_number_parameters      444 
_refine_ls_number_restraints      0 
_refine_ls_R_factor_all           0.0609 
_refine_ls_R_factor_gt            0.0447 
_refine_ls_wR_factor_ref          0.1077 
_refine_ls_wR_factor_gt           0.1012 
_refine_ls_goodness_of_fit_ref    1.043 
_refine_ls_restrained_S_all       1.043 
_refine_ls_shift/su_max           0.001 
_refine_ls_shift/su_mean          0.000 
  
loop_ 
 _atom_site_label 
 _atom_site_type_symbol 
 _atom_site_fract_x 
 _atom_site_fract_y 
 _atom_site_fract_z 
 _atom_site_U_iso_or_equiv 
 _atom_site_adp_type 
 _atom_site_occupancy 
 _atom_site_symmetry_multiplicity 
 _atom_site_calc_flag 
 _atom_site_refinement_flags 
 _atom_site_disorder_assembly 
 _atom_site_disorder_group 
Mo Mo 0.14458(2) 0.495222(11) 0.163210(7) 0.01799(6) Uani 1 1 d . . . 
S S 0.71310(8) 0.39206(5) 0.38080(3) 0.03522(14) Uani 1 1 d . . . 
F1 F 0.6122(3) 0.50174(19) 0.45892(14) 0.1023(11) Uani 1 1 d . . . 
F2 F 0.8298(3) 0.55641(14) 0.42319(10) 0.0803(7) Uani 1 1 d . . . 
F3 F 0.8537(3) 0.43587(16) 0.47667(7) 0.0639(6) Uani 1 1 d . . . 
O1 O 0.3753(2) 0.49945(10) 0.21196(7) 0.0271(3) Uani 1 1 d . . . 
O2 O -0.0651(3) 0.64403(17) 0.21281(10) 0.0612(7) Uani 1 1 d . . . 
O3 O 0.6484(3) 0.30815(15) 0.40736(11) 0.0583(6) Uani 1 1 d . . . 
O4 O 0.5942(4) 0.4435(3) 0.34621(12) 0.0915(10) Uani 1 1 d . . . 
O5 O 0.8748(3) 0.37837(18) 0.36051(8) 0.0506(5) Uani 1 1 d . . . 
N1 N -0.0273(2) 0.37711(14) 0.18189(8) 0.0251(4) Uani 1 1 d . . . 
N2 N -0.0589(2) 0.30215(14) 0.14609(8) 0.0276(4) Uani 1 1 d . . . 
N3 N -0.0379(2) 0.49200(12) 0.09303(7) 0.0217(3) Uani 1 1 d . . . 
N4 N -0.0733(2) 0.40786(13) 0.06520(7) 0.0232(3) Uani 1 1 d . . . 
N5 N 0.2798(2) 0.37971(13) 0.11789(7) 0.0225(3) Uani 1 1 d . . . 
N6 N 0.1884(2) 0.31133(13) 0.08819(8) 0.0265(4) Uani 1 1 d . . . 
N7 N 0.2734(2) 0.60965(13) 0.12014(7) 0.0223(3) Uani 1 1 d . . . 
N8 N 0.3127(2) 0.75468(13) 0.08482(8) 0.0277(4) Uani 1 1 d . . . 
N9 N 0.0239(2) 0.58420(15) 0.19427(8) 0.0297(4) Uani 1 1 d . . . 
C2 C 0.2567(3) 0.44600(17) 0.24188(9) 0.0267(4) Uani 1 1 d . . . 
C3 C 0.2074(4) 0.4953(3) 0.29315(11) 0.0448(7) Uani 1 1 d . . . 
C4 C 0.3100(4) 0.3416(2) 0.24956(12) 0.0389(6) Uani 1 1 d . . . 
C5 C 0.4651(4) 0.5839(2) 0.23541(12) 0.0390(6) Uani 1 1 d . . . 
C6 C -0.1690(3) 0.2400(2) 0.16743(13) 0.0391(6) Uani 1 1 d . . . 
C7 C -0.2094(3) 0.2744(2) 0.21689(13) 0.0451(7) Uani 1 1 d . . . 
C8 C -0.1184(3) 0.3606(2) 0.22447(11) 0.0367(6) Uani 1 1 d . . . 
C9 C -0.1866(3) 0.42647(19) 0.02322(9) 0.0283(4) Uani 1 1 d . . . 
C10 C -0.2259(3) 0.52393(19) 0.02342(10) 0.0297(5) Uani 1 1 d . . . 
C11 C -0.1305(3) 0.56225(17) 0.06782(9) 0.0249(4) Uani 1 1 d . . . 
C12 C 0.2934(3) 0.24989(18) 0.06479(11) 0.0367(6) Uani 1 1 d . . . 
C13 C 0.4557(3) 0.2770(2) 0.07902(12) 0.0386(6) Uani 1 1 d . . . 
C14 C 0.4422(3) 0.35827(17) 0.11232(10) 0.0285(4) Uani 1 1 d . . . 
C15 C 0.2091(3) 0.69866(16) 0.11191(9) 0.0249(4) Uani 1 1 d . . . 
C16 C 0.4528(3) 0.70047(17) 0.07588(10) 0.0291(5) Uani 1 1 d . . . 
C17 C 0.4276(3) 0.61138(17) 0.09745(9) 0.0258(4) Uani 1 1 d . . . 
C18 C 0.2778(4) 0.85576(19) 0.06741(15) 0.0405(6) Uani 1 1 d . . . 
C19 C 0.7532(4) 0.4758(2) 0.43738(13) 0.0439(6) Uani 1 1 d . . . 
B B -0.0040(3) 0.30945(18) 0.08760(11) 0.0273(5) Uani 1 1 d . . . 
H1B H -0.052(3) 0.2557(18) 0.0610(10) 0.024(6) Uiso 1 1 d . . . 
H3A H 0.127(5) 0.449(3) 0.3061(15) 0.069(12) Uiso 1 1 d . . . 
H3B H 0.168(4) 0.565(3) 0.2889(13) 0.046(9) Uiso 1 1 d . . . 
H3C H 0.301(4) 0.4933(19) 0.3235(14) 0.036(8) Uiso 1 1 d . . . 
H4A H 0.341(4) 0.312(2) 0.2146(13) 0.039(8) Uiso 1 1 d . . . 
H4B H 0.226(4) 0.311(3) 0.2609(14) 0.054(10) Uiso 1 1 d . . . 
H4C H 0.409(4) 0.336(2) 0.2779(14) 0.052(9) Uiso 1 1 d . . . 
H5A H 0.370(4) 0.633(3) 0.2473(14) 0.056(10) Uiso 1 1 d . . . 
H5B H 0.542(4) 0.605(2) 0.2080(12) 0.036(8) Uiso 1 1 d . . . 
H5C H 0.540(4) 0.562(2) 0.2648(14) 0.052(9) Uiso 1 1 d . . . 
H6 H -0.201(4) 0.187(2) 0.1493(13) 0.041(8) Uiso 1 1 d . . . 
H7 H -0.277(4) 0.253(2) 0.2373(16) 0.062(11) Uiso 1 1 d . . . 
H8 H -0.117(4) 0.404(2) 0.2513(13) 0.043(9) Uiso 1 1 d . . . 
H9 H -0.222(3) 0.368(2) -0.0026(11) 0.033(7) Uiso 1 1 d . . . 
H10 H -0.305(4) 0.553(2) 0.0003(12) 0.039(8) Uiso 1 1 d . . . 
H11 H -0.132(3) 0.6258(19) 0.0819(10) 0.024(6) Uiso 1 1 d . . . 
H12 H 0.250(3) 0.201(2) 0.0428(11) 0.028(7) Uiso 1 1 d . . . 
H13 H 0.555(4) 0.247(2) 0.0712(13) 0.048(9) Uiso 1 1 d . . . 
H14 H 0.530(3) 0.393(2) 0.1308(11) 0.031(7) Uiso 1 1 d . . . 
H15 H 0.103(3) 0.7186(18) 0.1197(10) 0.019(6) Uiso 1 1 d . . . 
H16 H 0.543(4) 0.721(2) 0.0606(13) 0.044(9) Uiso 1 1 d . . . 
H17 H 0.494(3) 0.556(2) 0.0993(11) 0.033(7) Uiso 1 1 d . . . 
H18A H 0.282(5) 0.854(3) 0.0305(19) 0.079(13) Uiso 1 1 d . . . 
H18B H 0.166(5) 0.873(3) 0.0731(14) 0.060(10) Uiso 1 1 d . . . 
H18C H 0.361(4) 0.896(2) 0.0834(13) 0.048(9) Uiso 1 1 d . . . 
  
loop_ 
 _atom_site_aniso_label 
 _atom_site_aniso_U_11 
 _atom_site_aniso_U_22 
 _atom_site_aniso_U_33 
 _atom_site_aniso_U_23 
 _atom_site_aniso_U_13 
 _atom_site_aniso_U_12 
Mo 0.01768(9) 0.01776(9) 0.01849(9) -0.00098(6) 0.00084(5) 0.00103(6) 
S 0.0276(3) 0.0403(3) 0.0364(3) -0.0047(3) -0.0084(2) 0.0009(2) 
F1 0.0683(16) 0.100(2) 0.142(3) -0.0784(18) 0.0334(17) -0.0050(13) 
F2 0.1070(18) 0.0353(10) 0.0968(17) 0.0064(10) -0.0072(14) -0.0303(11) 
F3 0.0813(14) 0.0748(14) 0.0333(9) 0.0030(9) -0.0125(9) -0.0233(11) 
O1 0.0266(8) 0.0245(8) 0.0291(8) 0.0001(6) -0.0058(6) -0.0019(6) 
O2 0.0600(14) 0.0558(14) 0.0702(16) -0.0193(12) 0.0229(12) 0.0245(11) 
O3 0.0473(12) 0.0360(11) 0.0938(18) -0.0185(11) 0.0198(12) -0.0180(9) 
O4 0.0786(19) 0.107(2) 0.082(2) -0.0033(18) -0.0503(16) 0.0327(18) 
O5 0.0419(11) 0.0749(15) 0.0359(11) -0.0044(10) 0.0094(8) -0.0034(10) 
N1 0.0230(8) 0.0277(9) 0.0246(9) 0.0052(7) 0.0015(7) -0.0042(7) 
N2 0.0254(9) 0.0241(9) 0.0327(10) 0.0060(7) -0.0029(7) -0.0058(7) 
N3 0.0197(8) 0.0233(8) 0.0218(8) 0.0011(6) -0.0007(6) -0.0002(6) 
N4 0.0207(8) 0.0262(9) 0.0221(8) -0.0023(7) -0.0017(6) -0.0017(7) 
N5 0.0216(8) 0.0207(8) 0.0249(8) -0.0036(6) -0.0001(6) 0.0015(6) 
N6 0.0305(9) 0.0195(8) 0.0292(9) -0.0070(7) 0.0001(7) 0.0005(7) 
N7 0.0189(8) 0.0199(8) 0.0278(9) 0.0005(7) -0.0003(6) -0.0002(6) 
N8 0.0233(9) 0.0212(9) 0.0377(11) 0.0046(7) -0.0039(8) -0.0043(7) 
N9 0.0282(10) 0.0307(10) 0.0305(10) -0.0050(8) 0.0045(8) 0.0070(8) 
C2 0.0282(11) 0.0305(11) 0.0207(10) 0.0031(8) -0.0031(8) -0.0004(8) 
C3 0.0452(16) 0.065(2) 0.0231(12) -0.0021(12) -0.0028(11) 0.0000(15) 
C4 0.0447(15) 0.0316(13) 0.0386(15) 0.0119(11) -0.0106(12) -0.0014(11) 
C5 0.0413(15) 0.0349(13) 0.0386(14) -0.0037(11) -0.0132(12) -0.0079(11) 
C6 0.0297(12) 0.0330(13) 0.0535(17) 0.0186(12) -0.0065(11) -0.0100(10) 
C7 0.0292(13) 0.0578(18) 0.0485(17) 0.0295(14) 0.0030(12) -0.0088(12) 
C8 0.0281(12) 0.0524(16) 0.0302(12) 0.0128(11) 0.0066(9) -0.0027(11) 
C9 0.0217(10) 0.0391(12) 0.0237(10) -0.0002(9) -0.0014(8) -0.0031(9) 
C10 0.0216(10) 0.0410(13) 0.0258(11) 0.0069(9) -0.0035(8) 0.0008(9) 
C11 0.0184(9) 0.0303(11) 0.0258(10) 0.0052(8) -0.0004(8) 0.0020(8) 
C12 0.0409(14) 0.0265(12) 0.0424(14) -0.0128(10) 0.0009(11) 0.0059(10) 
C13 0.0336(13) 0.0330(13) 0.0495(16) -0.0103(11) 0.0048(11) 0.0141(10) 
C14 0.0244(10) 0.0266(11) 0.0342(12) -0.0019(9) 0.0006(9) 0.0059(8) 
C15 0.0205(10) 0.0235(10) 0.0301(11) 0.0013(8) -0.0015(8) 0.0003(8) 
C16 0.0223(10) 0.0294(11) 0.0354(12) 0.0036(9) 0.0009(9) -0.0052(8) 
C17 0.0198(9) 0.0262(10) 0.0313(11) -0.0006(8) 0.0017(8) -0.0005(8) 
C18 0.0358(14) 0.0247(12) 0.0599(19) 0.0156(12) -0.0043(13) -0.0036(10) 
C19 0.0482(17) 0.0321(13) 0.0519(17) -0.0064(12) 0.0060(13) -0.0075(12) 
B 0.0279(12) 0.0226(11) 0.0305(12) -0.0039(9) -0.0042(9) -0.0033(9) 
  
_geom_special_details 
; 
 All esds (except the esd in the dihedral angle between two l.s. planes) 
 are estimated using the full covariance matrix.  The cell esds are taken 
 into account individually in the estimation of esds in distances, angles 
 and torsion angles; correlations between esds in cell parameters are only 
 used when they are defined by crystal symmetry.  An approximate (isotropic) 
 treatment of cell esds is used for estimating esds involving l.s. planes. 
; 
  
loop_ 
 _geom_bond_atom_site_label_1 
 _geom_bond_atom_site_label_2 
 _geom_bond_distance 
 _geom_bond_site_symmetry_2 
 _geom_bond_publ_flag 
Mo N9 1.7570(19) . ? 
Mo O1 2.1259(16) . ? 
Mo N3 2.1802(18) . ? 
Mo C2 2.181(2) . ? 
Mo N7 2.1840(18) . ? 
Mo N1 2.1861(18) . ? 
Mo N5 2.2493(17) . ? 
S O4 1.416(2) . ? 
S O5 1.424(2) . ? 
S O3 1.434(2) . ? 
S C19 1.813(3) . ? 
F1 C19 1.322(4) . ? 
F2 C19 1.319(3) . ? 
F3 C19 1.329(4) . ? 
O1 C2 1.436(3) . ? 
O1 C5 1.457(3) . ? 
O2 N9 1.193(3) . ? 
N1 C8 1.332(3) . ? 
N1 N2 1.364(3) . ? 
N2 C6 1.352(3) . ? 
N2 B 1.534(3) . ? 
N3 C11 1.338(3) . ? 
N3 N4 1.359(2) . ? 
N4 C9 1.348(3) . ? 
N4 B 1.543(3) . ? 
N5 C14 1.341(3) . ? 
N5 N6 1.367(2) . ? 
N6 C12 1.342(3) . ? 
N6 B 1.531(3) . ? 
N7 C15 1.332(3) . ? 
N7 C17 1.382(3) . ? 
N8 C15 1.336(3) . ? 
N8 C16 1.369(3) . ? 
N8 C18 1.469(3) . ? 
C2 C4 1.498(3) . ? 
C2 C3 1.505(4) . ? 
C6 C7 1.362(5) . ? 
C7 C8 1.390(4) . ? 
C9 C10 1.370(4) . ? 
C10 C11 1.390(3) . ? 
C12 C13 1.367(4) . ? 
C13 C14 1.389(3) . ? 
C16 C17 1.350(3) . ? 
  
loop_ 
 _geom_angle_atom_site_label_1 
 _geom_angle_atom_site_label_2 
 _geom_angle_atom_site_label_3 
 _geom_angle 
 _geom_angle_site_symmetry_1 
 _geom_angle_site_symmetry_3 
 _geom_angle_publ_flag 
N9 Mo O1 102.32(8) . . ? 
N9 Mo N3 90.16(8) . . ? 
O1 Mo N3 162.09(7) . . ? 
N9 Mo C2 91.85(9) . . ? 
O1 Mo C2 38.91(7) . . ? 
N3 Mo C2 155.04(8) . . ? 
N9 Mo N7 90.11(8) . . ? 
O1 Mo N7 80.64(6) . . ? 
N3 Mo N7 86.61(6) . . ? 
C2 Mo N7 118.25(8) . . ? 
N9 Mo N1 93.04(9) . . ? 
O1 Mo N1 115.54(6) . . ? 
N3 Mo N1 75.99(7) . . ? 
C2 Mo N1 79.06(8) . . ? 
N7 Mo N1 162.31(7) . . ? 
N9 Mo N5 174.91(8) . . ? 
O1 Mo N5 82.76(6) . . ? 
N3 Mo N5 84.82(6) . . ? 
C2 Mo N5 92.34(8) . . ? 
N7 Mo N5 90.45(7) . . ? 
N1 Mo N5 84.92(7) . . ? 
O4 S O5 116.02(18) . . ? 
O4 S O3 115.18(19) . . ? 
O5 S O3 114.52(14) . . ? 
O4 S C19 102.87(17) . . ? 
O5 S C19 103.57(14) . . ? 
O3 S C19 101.94(14) . . ? 
C2 O1 C5 121.6(2) . . ? 
C2 O1 Mo 72.63(11) . . ? 
C5 O1 Mo 128.83(15) . . ? 
C8 N1 N2 107.0(2) . . ? 
C8 N1 Mo 132.22(19) . . ? 
N2 N1 Mo 120.77(14) . . ? 
C6 N2 N1 108.6(2) . . ? 
C6 N2 B 129.6(2) . . ? 
N1 N2 B 120.26(17) . . ? 
C11 N3 N4 106.65(18) . . ? 
C11 N3 Mo 132.00(15) . . ? 
N4 N3 Mo 121.33(13) . . ? 
C9 N4 N3 109.31(18) . . ? 
C9 N4 B 130.00(19) . . ? 
N3 N4 B 120.18(17) . . ? 
C14 N5 N6 106.16(18) . . ? 
C14 N5 Mo 134.49(15) . . ? 
N6 N5 Mo 119.35(13) . . ? 
C12 N6 N5 109.45(19) . . ? 
C12 N6 B 129.6(2) . . ? 
N5 N6 B 120.90(17) . . ? 
C15 N7 C17 105.43(18) . . ? 
C15 N7 Mo 122.75(15) . . ? 
C17 N7 Mo 131.81(14) . . ? 
C15 N8 C16 107.80(19) . . ? 
C15 N8 C18 125.0(2) . . ? 
C16 N8 C18 127.2(2) . . ? 
O2 N9 Mo 176.1(2) . . ? 
O1 C2 C4 111.1(2) . . ? 
O1 C2 C3 114.7(2) . . ? 
C4 C2 C3 114.2(2) . . ? 
O1 C2 Mo 68.46(10) . . ? 
C4 C2 Mo 120.11(17) . . ? 
C3 C2 Mo 119.32(18) . . ? 
N2 C6 C7 109.1(3) . . ? 
C6 C7 C8 105.1(2) . . ? 
N1 C8 C7 110.2(3) . . ? 
N4 C9 C10 108.8(2) . . ? 
C9 C10 C11 104.9(2) . . ? 
N3 C11 C10 110.3(2) . . ? 
N6 C12 C13 109.0(2) . . ? 
C12 C13 C14 105.0(2) . . ? 
N5 C14 C13 110.4(2) . . ? 
N7 C15 N8 110.9(2) . . ? 
C17 C16 N8 106.4(2) . . ? 
C16 C17 N7 109.5(2) . . ? 
F2 C19 F1 107.5(3) . . ? 
F2 C19 F3 105.6(3) . . ? 
F1 C19 F3 107.8(3) . . ? 
F2 C19 S 112.7(2) . . ? 
F1 C19 S 111.5(2) . . ? 
F3 C19 S 111.4(2) . . ? 
N6 B N2 109.87(19) . . ? 
N6 B N4 108.82(18) . . ? 
N2 B N4 105.88(19) . . ? 
  
_diffrn_measured_fraction_theta_max    0.946 
_diffrn_reflns_theta_full              32.50 
_diffrn_measured_fraction_theta_full   0.946 
_refine_diff_density_max    1.134 
_refine_diff_density_min   -0.442 
_refine_diff_density_rms    0.108 
